# Supplementary material
Source: MDPI journal article supplement (https://www.mdpi.com/2073-445X/12/8/1517)
Supplement: s1 [file s1]

Table S1. List of vegetation identified during plant surveys, including their assigned functional type and scientific names.

| Functional type   | Plant (Common name)   | Scientific name                                        |
|-------------------|-----------------------|--------------------------------------------------------|
| Cool season grass | Scribners Panicum     | <i>Panicum oligosanthos</i>                            |
| Cool season grass | Texas Wintergrass     | <i>Stipa leucotricha</i>                               |
| Forb              | Beebalm               | <i>Monarda</i> spp.                                    |
| Forb              | Buckwheat             | <i>Eriogonum</i> spp.                                  |
| Forb              | California Filaree    | <i>Erodium</i> spp.                                    |
| Forb              | Day Lilly             | <i>Hemerocallis</i> spp.                               |
| Forb              | Geranium              | <i>Geranium</i> spp.                                   |
| Forb              | Heath Aster           | <i>Aster ericoides</i>                                 |
| Forb              | Indian Paintbrush     | <i>Castilleja indivisa</i>                             |
| Forb              | Mint                  | <i>Mentha</i> spp.                                     |
| Forb              | Mustard               | <i>Brassica</i> spp.                                   |
| Forb              | Plantain              | <i>Plantago</i> spp.                                   |
| Forb              | Prairie Parsley       | <i>Polytaenia nuttallii</i>                            |
| Forb              | Ragweed               | <i>Ambrosia</i> spp.                                   |
| Forb              | Vetch                 | <i>Vicia</i> spp.                                      |
| Forb              | Western Ragweed       | <i>Ambrosia psilostachya</i>                           |
| Forb              | Wild Onion            | <i>Allium canadense</i>                                |
| Forb              | Wood Sorrel           | <i>Oxalis</i> spp.                                     |
| Forb              | Yarrow                | <i>Achillea</i> spp.                                   |
| Forb              | Yucca                 | <i>Yucca</i> spp.                                      |
| Grass like        | Sedge                 | <i>Carex</i> spp.                                      |
| Introduced        | Annual Brome          | <i>Bromus</i> spp.                                     |
| Introduced        | Annual Broomweed      | <i>Gutierrezia dracunculoides</i>                      |
| Introduced        | King Ranch Bluestem   | <i>Bothriochloa ischaemum</i> var. <i>songarica</i>    |
| Medium grass      | Carolina Jointtail    | <i>Coelorachis cylindrica</i>                          |
| Medium grass      | Fall Witchgrass       | <i>Digitaria cognata</i>                               |
| Medium grass      | Knotroot Bristlegrass | <i>Setaria geniculata</i>                              |
| Medium grass      | Longspike Tridens     | <i>Tridens strictus</i>                                |
| Medium grass      | Meadow Dropseed       | <i>Sporobolus drummondii</i>                           |
| Medium grass      | Purpletop Tridens     | <i>Tridens flavus</i>                                  |
| Medium grass      | Side Oats Grama       | <i>Bouteloua curtipendula</i> var. <i>curtipendula</i> |
| Medium grass      | Silverbluestem        | <i>Bothriochloa saccharides</i> var. <i>torreyana</i>  |
| Medium grass      | Talldropseed          | <i>Sporobolus compositus</i>                           |
| Medium grass      | Tumble Windmill       | <i>Chloris verticillata</i>                            |
| Medium grass      | Vine Mesquite         | <i>Panicum obtusum</i>                                 |
| Short grass       | 6 weeks fescue        | <i>Vulpia octoflora</i>                                |
| Short grass       | Annual Threeawn       | <i>Aristida oligantha</i>                              |
| Short grass       | Perennial 3 awn       | <i>Aristida purpurea</i>                               |
| Tall grass        | Big Bluestem          | <i>Andropogon gerardii</i>                             |
| Tall grass        | Florida Paspalum      | <i>Paspalum floridanum</i>                             |
| Tall grass        | Indiangrass           | <i>Sorghastrum nutans</i>                              |
| Tall grass        | Little Bluestem       | <i>Schizachyrium scoparium</i> var. <i>frequens</i>    |

|            |             |                         |
|------------|-------------|-------------------------|
| Tall grass | Switchgrass | <i>Panicum virgatum</i> |
|------------|-------------|-------------------------|
